# Supplementary material
Source: publisher figshare collection journal article supplement (https://sage.figshare.com/ndownloader/files/15017243)
Supplement: Supplementary file 1 [file 15017243]

## Sheet: Sheet1
Populist parties in Europe, 1999-2018
Country	Party	Party success					Party leadership							Party ideology							Party organization	Institutions									Media system	Party system
			Representation in parliament			Participation in government? [0=no, 1=external support, 2=yes, 3=leadership]	Name	Party founder? [0=no, 1=yes]	What time span?			Celebrity		Right-wing?			Euroskepticism?	Corruption?	Anti-finance?	Anti-immigrants?	New party? [0=no, 1=yes]	Derex year	Anti-establishment Attitudes [DEREX]	Party legitimacy	Institutional legitimacy - parliaments	Institutional legitimacy - governments	Trust in democracy				Hallin-Mancini & Castro Herrero et al. class	Emanuele & Chiaramonte 2016
		Currently existing? [0=no, 1=yes]	Continued presence?	Best result? [votes]	Best rank?					How many years?	Still in office? [0=no, 1=yes]	Internal to political system?	Outside social capital	ParlGov L-R	Manifesto Project year	Manifesto Project RiLe	Manifesto Project EU: negative [per 110]	Manifesto Project Political corruption [per 304]	Manifesto Project Foreign financial inflluence [per 103.2]	Manifesto Project Immigration: negative [per 601.2]				Eurobarometer - parties (tend to trust)	Eurobarometer - national parliament (tend to trust)	Eurobarometer - national government (tend to trust)	Eurobarometer 1973 - satisfaction with democracy, net value ((VS+FS)-(NV+NaA))	Eurobarometer 1999 - satisfaction with democracy ((VS+FS)-(NV+NAA))	Eurobarometer 2004 - satisfaction with democracy ((VS+FS)-(NV+NAA))	Eurobarometer 2010 - satisfaction with democracy ((VS+FS)-(NV+NAA))	a=mediterranean; b=anglo-saxon; c= central-north Europe; d=eastern northern cluster; e= eastern central cluster; f= eastern eastern cluster	Cumulative party system innovation in the last election held in each country.	Variation in the cumulative party system innovation since 2010.
Austria	Freedom Party (FPÖ)	1	1999-2018	0.269	2	2	Jörg Haider	0	1986-2000	15	0	Insider		8.3	2013	12.174	4.348	0.87	0	7.826	0	2003	15	0.19587	0.42217	0.4042		0.362854	0.321291	0.573	C	22.6	-1.7
	Alliance for the future of Austria (BZÖ)	1	2006-2013	0.107	4	2	Josef Bucher	0	2009-2013	5	0	Insider		8.8	2008	-8.721	0.581	1.453			1	2007	15	0.29754	0.57072	0.57171		0.362854	0.321291	0.573	C	22.6	-1.7
	Team Stronach	0	2013-2017	0.057	5	0	Frank Stronach	1	2012-2015	4	0	Outsider	Business	6	2013	0.971	3.803	8.414	0.566	0.243	1	2011	14	0.2997	0.64181	0.62377		0.362854	0.321291	0.573	C	22.6	-1.7
Belgium	Flemish Interest (VB)	1	1999-2018	0.12	4	0	Frank Vanhecke	0	2001-2008	8	0	Insider		9.7	2010	39.443	0.733	0.147			0	2009	11	0.28484	0.41099	0.35605	0.3	0.029139	0.265438	0.122409	C	43.5	13.6
	National Front (FN)	0	1999-2010	0.02	9	0	Daniel Féret	1	1985-2007	23	0	Insider		9.7							1	2003	12	0.21544	0.4412	0.42465	0.3	0.029139	0.265438	0.122409	C	43.5	13.6
	List Dedecker (LDD)	1	2007-2014	0.04	7	0	Jean-Marie Dedecker	1	2007-2018	12	1	Outsider	Sports	6	2010	41.463	0	2.439			1	2009	11	0.28484	0.41099	0.35605	0.3	0.029139	0.265438	0.122409	C	43.5	13.6
	Parti du Travail de Belgique (PTB)	1	2014-2018	0.037	11	0	Peter Mertens	0	2008-2018	11	1	Insider		1.2							0	2007	10	0.29256	0.6637	0.61919	0.3	0.029139	0.265438	0.122409	C	43.5	13.6
	Parti Populaire (PP)	1	2010-2018	0.015	13	0	Mischaël Modrikamen	1	2009-2018	10	1	Outsider	Law	7.4							1	2009	11	0.28484	0.41099	0.35605	0.3	0.029139	0.265438	0.122409	C	43.5	13.6
Bulgaria	Citizens for European Development of Bulgaria (Grazhdani za Evropeysko Razvitie na Balgariya, GERB)	1	2009-2018	0.397	1	3	Boyko Borisov	1	2006-2018	13	1	Insider		7.4	2017	2.439	0	1.325	0	0.883	1	2013	51	0.15063	0.12634	0.16019			-0.52291	-0.484	F
	National Movement Simeon II (Natsionalno Dvizhenie Simeon Vtori, NDSV)	1	2001-2013	0.427	1	3	Simeon Saxe-Coburg-Gotha	1	2001-2009	8	0	Outsider	Royal family	5.8	2005	-8.56	0	1.167			1	2007	54	0.06755	0.13859	0.21827			-0.52291	-0.484	F
	National Union Attack (Natsionalen Sayuz Ataka, ATAKA)	1	2005-2017	0.094	4	0	Volen Siderov	1	2005-2018	14	1	Outsider	Media	5.5	2014	-11.628	11.628	0	1.163	0	1	2007	54	0.06755	0.13859	0.21827			-0.52291	-0.484	F
	Law, Order and Justice (RZS)	1	2009-2013	0.041	6	0	Yane Yanev	1	2005-2018	14	1	Insider		8.7							1	2007	54	0.06755	0.13859	0.21827			-0.52291	-0.484	F
Croatia	Croatian Democratic Union (HDZ)	1	2000-2018	0.359	1	3	Ivo Sanader	1	2000-2009	10	0	Insider		7.1	2016	-2.794	0	0.49	0	0	1	2009	33	0.07	0.156	0.135			-0.47	-0.51648	E
	Croatian Labourists - Labour Party (HL-SR)	1	2011-2016	0.042	3	0	Dragutin Lesar	1	2010-2014	5	0	Insider		1.2	2011	-48.444	0	10.222			1	2009	33	0.07	0.156	0.135			-0.47	-0.51648	E
	Croatian Party of Rights dr. Ante Starčević (HSP-AS)	1	2011-2016	0.006	9	0	Ruža Tomašić	1	2009-2014	6	0	Outsider	Law enforcement	8.7							1	2009	33	0.07	0.156	0.135			-0.47	-0.51648	E
Czech Republic	ANO	1	2013-2018	0.296	1	3	Andrej Babiš	1	2012-2018	7	1	Outsider	Business	6	2013	-9.945	0	1.657			1	2011	28	0.09381	0.12035	0.14188			-0.07256	-0.08521	E
	Dawn of Direct Democracy (Úsvit přímé demokracie, ÚSVIT)	1	2013-2017	0.069	6	0	Tomio Okamura	1	2013-2015	3	0	Outsider	Entertainment	7.4	2013	5.498	1.718	1.375			1	2013	31	0.0998	0.11078	0.12887			-0.07256	-0.08521	E
	Public Affairs (Věci veřejné, VV)	0	2010-2013	0.109	5	2	Vít Bárta	0	2013	1	0	Outsider	Business	6	2010	0.83	0.237	6.287			1	2013	31	0.0998	0.11078	0.12887			-0.07256	-0.08521	E
Denmark	Danish People's Party	1	1999-2018	0.206	2	0	Pia Kjærsgaard	1	1995-2012	18	0	Insider		8.2	2011	31.124	6.34	0			1	2003	4	0.37335	0.6906	0.52773	-0.08	0.631102	0.820665	0.828203	C	38.4	7.8
Estonia	Res Publica/Union for the Republic (Erakond Res Publica, RP)	0	2003-2007	0.246	2	3	Juhan Parts	1	2001-2005	5	0	Insider		8.5	2003	-1.754	0	8.187			1	2005	15	0.17483	0.40859	0.43956			-0.05594	-0.064	D
Finland	True Finns	1	1999-2018	0.191	3	2	Timo Soini	1	1997-2017	21	0	Insider		6.6	2011	0.472	4.113	0			1	2003	5	0.24295	0.62308	0.59306		0.367551	0.540121	0.404	C	32.2	12.2
France	FN	1	1999-2007, 2012-2018	0.136	3	0	Marine Le Pen	0	2011-2018	8	1	Insider		9.7	2017	5.039	0.775	0	0	4.264	0	2011	20	0.08923	0.31507	0.27495	-0.05	0.222425	0.136078	0.116667	A	56.8	-2.9
	La France Insoumise	1	2017-2018	0.11	4	0	Jean-Luc Mélenchon	1	2016-2018	3	1	Insider		1.2	2017	-30.019	2.242	1.17	0	0	1	2015	21	0.04814	0.20863	0.18976	-0.05	0.222425	0.136078	0.116667	A	56.8	-2.9
Germany	Die Linke	1	1999-2018	0.119	4	0	Oskar Lafontaine	0	2007-2009	3	0	Insider		1.2	2017	-41.914	0.025	0.812	0.152	0	0	2007	16	0.1829	0.5076	0.49108	-0.11	0.363613	0.027571	0.259406	C	27.9	-0.6
	AfD	1	2017-2018	0.126	3	0	Frauke Petry	0	2015-2017	3	0	Insider		8.7	2017	17.43	5.876	4.482	0.1	7.968	1	2015	11	0.26272	0.53312	0.49871	-0.11	0.363613	0.027571	0.259406	C	27.9	-0.6
Greece	Independent Greeks (ANEL)	1	2012-2018	0.106	4	2	Panos Kammenos	1	2012-2018	7	1	Insider		8.7	2015-01-01	46.154	0	0	11.538	7.692	1	2011	62	0.051	0.175	0.164		0.248365	0.290047	-0.374	A	22.2	11.7
	Golden Dawn	1	2012-2018	0.07	3	0	Nikolaos Michaloliakos	1	1980-2018	39	1	Insider		8.7	2015-01-01	2.326	0	4.651	14.535	3.488	0	2011	62	0.051	0.175	0.164		0.248365	0.290047	-0.374	A	22.2	11.7
	LAOS	1	2007-2012	0.056	4	2	Georgios Karatzaferis	1	2000-2018	19	1	Outsider	Media	9.1	2007	-1.571	0.823	4.637			1	2005	16	0.226	0.47	0.399		0.248365	0.290047	-0.374	A	22.2	11.7
	Syriza	1	2004-2018	0.363	1	3	Alexis Tsipras	0	2008-2018	11	1	Insider		2.9	2015-09-01	-22.234	1.977	3.954	2.463	0	1	2005	16	0.226	0.47	0.399		0.248365	0.290047	-0.374	A	22.2	11.7
Hungary	Fidesz—Hungarian Civic Alliance (Fidesz—Magyar Polgári Szövetség)	1	1999-2018	0.527	1	3	Viktor Orban	0	1993-2000, 2003-2018	24	1	Insider		6.5	2014	35.411	0.85	0.85	5.099	0	0	2009	46	0.10369	0.14542	0.13831			-0.23373	-0.28208	F
	Movement for a Better Hungary (Jobbik Magyarországért Mozgalom, Jobbik)	1	2010-2018	0.202	2	0	Gábor Vona	0	2006-2018	13	1	Insider		8.7	2014	-7.324	1.527	2.166	1.877	0	1	2009	46	0.10369	0.14542	0.13831			-0.23373	-0.28208	F
	Politics Can Be Different (Lehet Más a Politika, LMP)	1	2010-2018	0.075	4	0	Bernadett Szél	0	2010-2018	9	1	Outsider	Academia	2.5	2014	-10.706	0	5.398	0	0	1	2009	46	0.10369	0.14542	0.13831			-0.23373	-0.28208	F
Iceland	Citizens' Movement (BF)	0	2009-2013	0.072	5	0	[Collective leadership]							6	2009	-1.613	0	4.839			1	2010	--	0.11776	0.36	0.37	--	--	--	--	C	25.1	15.1
Ireland	Sinn Féin (SF)	1	1999-2018	0.139	3	0	Gerry Adams	0	1983-2018	36	0	Insider		2.8	2016	-12.514	3.013	2.202	0	0	0	2003	13	0.19995	0.35095	0.32299	0.12	0.555299	0.469412	0.182446	B	26.9	5.9
Italy	Forza Italia	1	1999-2018	0.382	1	3	Silvio Berlusconi	1	1994-2018	25	1	Outsider	Business	7.1	2013	3.81	0	2.381			1	2003	11	0.14762	0.40481	0.34262	-0.45	-0.29776	-0.26606	-0.04572	A	72.8	14.5
	Fratelli d'Italia	1	2013-2018	0.044	5	0	Giorgia Meloni	1	2014-2018	5	1	Insider		7.4	2013	15.835	1.735	2.386			1	2013	33	0.07221	0.12154	0.11177	-0.45	-0.29776	-0.26606	-0.04572	A	72.8	14.5
	Lega	1	1999-2018	0.175	3	2	Matteo Salvini	0	2013-2018	6	1	Insider		7.8	2013	3.81	0	2.381			0	2013	33	0.07221	0.12154	0.11177	-0.45	-0.29776	-0.26606	-0.04572	A	72.8	14.5
	Movimento 5 Stelle	1	2013-2018	0.325	1	0	Beppe Grillo	1	2009-2017	9	0	Outsider	Entertainment	2.5	2013	-49.032	0	5.161			1	2013	33	0.07221	0.12154	0.11177	-0.45	-0.29776	-0.26606	-0.04572	A	72.8	14.5
Latvia	New Era Party (Jaunais laiks, JL)	0	2002-2010	0.239	1	3	Einars Repše	1	2001-2007	7	0	Outsider	Central bank	7.3	2002	-8.955	0	7.463			1	2007	35	0.06866	0.18559	0.19763			-0.05274	-0.34032	D
Lithuania	The Labour Party (Darbo Partija, DP)	1	2004-2018	0.284	1	2	Viktor Uspaskich	1	2003-2018	16	1	Outsider	Business	3.9	2012	-24.02	0	0.858			1	2009	45	0.08456	0.10039	0.18996			-0.28144	-0.62414	D
	Order and Justice Party (TT)	1	2004-2018	0.127	3	2	Rolandas Paksas	1	2002-2004	3	0	Outsider	Sports	5.3	2012	2.597	0	7.143			1	2009	45	0.08456	0.10039	0.18996			-0.28144	-0.62414	D
Luxembourg	Alternative Democratic Reform Party (ADR)	1	1999-2018	0.104	4	0	Robert Mehlen	0	1991-2013	23	0	Insider		8.8	2013	4.704	1.757	0.108			0	2003	6	0.31074	0.6418	0.68028	0.15	0.71049	0.632187	0.689109	C	21.2	0.5
Netherlands	List Pim Fortuyn (LPF)	0	2002-2006	0.17	2	2	Pim Fortuyn	1	2002	1	0	Outsider	Academia	8.6	2002	14.961	0	0			1	2003	7	0.32464	0.51363	0.4348	0.14	0.582734	0.297421	0.516288	C	32.4	5.1
	Liveable Netherlands (LN)	0	2002-2003	0.016	10	0	Jan Nagel	1	1999-2004	6	0	Insider		8.7	2002	10.138	0	0			1	2003	7	0.32464	0.51363	0.4348	0.14	0.582734	0.297421	0.516288	C	32.4	5.1
	Freedom Party (PVV)	1	2006-2018	0.155	3	1	Geert Wilders	1	2006-2018	13	1	Insider		8.8	2012	15.642	19.633	1.618			1	2005	8	0.34757	0.53181	0.40457	0.14	0.582734	0.297421	0.516288	C	32.4	5.1
Norway	Progress Party (FrP)	1	1999-2018	0.229	2	2	Carl Hagen	0	1978-2006	29	0	Insider		8.8	2009	6.763	0	0.099			0	2003	4	--	--	--	--	--	--	--	C	21.8	-3.6
Poland	Kukiz Movement (Kukiz’15)	1	2015-2018	0.088	3	0	Paweł Kukiz	1	2015-2018	4	1	Outsider	Entertainment	8.7							1	2015	36	0.12725	0.16533	0.20441			-0.35	0.154	E
	League of Polish Families (Liga Polskich Rodzin, LPR)	1	2001-2007	0.08	5	2	Roman Giertych	1	2001-2007	7	0	Insider		8.9	2005	8.333	2.381	0			1	2003	22	0.052	0.08408	0.128			-0.35	0.154	E
	Law and Justice (Prawo i Sprawiedliwość, PiS)	1	2001-2018	0.376	1	3	Jarosław Kaczyński	1	2003-2018	16	1	Insider		7.7	2011	17.473	0.93	0.453			1	2003	22	0.052	0.08408	0.128			-0.35	0.154	E
	Self Defence (Samoobrona Rzeczypospolitej Polskiej)	1	2001-2007	0.114	3	2	Andrzej Lepper	1	1992-2011	20	0	Insider		4	2005	-5.637	0	0			1	2003	22	0.052	0.08408	0.128			-0.35	0.154	E
Romania	Greater Romania Party (Partidul România Mare, PRM)	1	1999-2008	0.195	2	0	Corneliu Vadim Tudor	1	1991-2015	25	0	Outsider	Media	6.7	2004	5.56	0	0			1	2007	32	0.108	0.19431	0.19529			-0.37648	-0.58235	F
	People’s Party—Dan Diaconescu (Partidul Poporului—Dan Diaconescu, PP-DD)	0	2012-2016	0.14	3	0	Dan Diaconescu	1	2011-2012	2	0	Outsider	Media	1.2	2012	-20.741	0	0			1	2009	31	0.11957	0.15514	0.21464			-0.37648	-0.58235	F
Slovakia	Alliance of the New Citizen (Aliancia Nového Občana, ANO)	1	2002-2006	0.08	6	2	Pavol Rusko	1	2001-2007	7	0	Outsider	Business	7.2	2002	18.486	0	3.118			1	2005	30	0.11271	0.23014	0.22182			-0.48843	-0.27653	D
	Direction–Social Democracy (Smer–sociálna demokracia, Smer-SD)	1	2002-2018	0.444	1	3	Robert Fico	1	1999-2018	20	1	Insider		3.4	2012	-9.731	0.128	0.128			1	2005	30	0.11271	0.23014	0.22182			-0.48843	-0.27653	D
	Party of Civic Understanding (Strana občianskeho porozumenia, SOP)	0	1999-2002	0.08	6	2	Rudolf Schuster	1	1998-1999	2	0	Insider		3.3	1998	-6.393	0	0.457			1	--	--	--	--	--			-0.48843	-0.27653	D
	People’s Party—Movement for a Democratic Slovakia (Ľudová strana— Hnutie za demokratické Slovensko, ĽS-HZDS)	0	1999-2010	0.27	1	3	Vladimír Mečiar	1	1991-2014	24	0	Insider		4.9	2010	12.019	0	0.481			1	2005	30	0.11271	0.23014	0.22182			-0.48843	-0.27653	D
	Slovak National Party (Slovenská národná strana, SNS)	1	1999-2002, 2006-2012, 2016-2018	0.117	3	2	Ján Slota	1	1994-1999, 2003-2014	18	0	Insider		7	2012	15.421	10.28	0.467			1	2005	30	0.11271	0.23014	0.22182			-0.48843	-0.27653	D
	Ordinary People and Independent Personalities (Obyčajní Ľudia a nezávislé osobnosti, OĽaNO)	1	2010-2018	0.11	3	0	Igor Matovič	1	2011-2018	8	1	Insider		7.4	2012	21.759	3.472	5.556			1	2009	17	0.15305	0.37617	0.38252			-0.48843	-0.27653	D
Slovenia	Slovenian National Party (Slovenska nacionalna stranka, SNS)	1	1999-2011	0.063	6	0	Zmago Jelinčič Plemeniti	1	1991-2018	28	1	Insider		4.8	2011	6.038	0.755	4.528			0	2003	19	0.169	0.364	0.352			0.168	-0.24059	E
Spain	Podemos	1	2015-2018	0.134	3	0	Pablo Iglesias	1	2014-2018	5	1	Insider		1.2	2016	-32.952	0	2.517	0	0	1	2013	33	0.04752	0.06825	0.07616		0.457272	0.343788	0.073559	A	40.7	34
Sweden	Sweden Democrats (SD)	1	2010-2018	0.129	3	0	Jimmie Åkesson	0	2005-2018	14	1	Insider		8.7	2014	-6.646	2.532	0	0	3.481	0	2005	8	0.21777	0.46191	0.33105		0.32196	0.482254	0.693041	C	28.5	11.1
Switzerland	SVP	1	1999-2018	0.294	1	3	Christoph Blocher	0	1991-2018	28	0	Outsider	Business	7.4	2011	0.833	35	0			0	2003	4	--	--	--	--	--	--	--	C	18	-1.7
	League of Ticinesians (LdTi)	1	1999-2018	0.009	9	0	Giuliano Bignasca	1	1991-2013	23	0	Outsider	Business	8.7	2007	13.303	2.752	0			0	2003	4	--	--	--	--	--	--	--	C	18	-1.7
	Swiss Democrats (SD)	1	1999-2007	0.018	7	0	Rudolf Keller	0	1986-2005	20	0	Insider		9.4	2003	18.908	1.681	0			0	2003	4	--	--	--	--	--	--	--	C	18	-1.7
	Geneva Citizens' Movement (MCG)	1	2011-2018	0.004	11	0	Éric Stauffer	1	2008-2012	5	0	Insider		8.7	2011	-10.526	0	0			1	2007	5	--	--	--	--	--	--	--	C	18	-1.7
UK	UKIP	1	2015-2017	0.127	3	0	Nigel Farage	0	2006-2009, 2010-2016	9	0	Insider		7.8	2015	-7.784	16.531	0.815			1	2009	17	0.11686	0.17382	0.21598	-0.1	0.340012	0.218934	0.218085	B	24.8	14.5
Mean		0.833333		0.157136	3.87879	0.454545		0.692308		12.5538	0.430769			6.56061		0.916817	2.50293	2.12187			0.757576		24.4219	0.152412	0.292282	0.283889						35.0972	7.40833
SD				0.123496	2.78189					8.95131				2.54757		19.4771	5.73726	2.58735					15.9262	0.0933693	0.183345	0.155955
Sources for populist parties: Moffitt (2016), Stanley (2017), Rupnik (2016), van Kessel (2015)
http://www.parlgov.org/, http://derexindex.eu, Wikipedia
https://visuals.manifesto-project.wzb.eu/mpdb-shiny/cmp_dashboard_dataset/
Eurobarometer data refers to the first observation of the year when multiple ones are available
States: EEA members minus Cyprus, Malta, and Portugal (no populist parties)
Data current to February 2018

## Sheet: Sheet2
Outsider leader subgroup of populist parties in Europe, 1999-2018
Country	Party	Party success					Party leadership							Party ideology							Party organization	Institutions									Media system	Party system
			Representation in parliament			Participation in government? [0=no, 1=external support, 2=yes, 3=leadership]	Name	Party founder? [0=no, 1=yes]	What time span?			Celebrity		Right-wing?			Euroskepticism?	Corruption?	Anti-finance?	Anti-immigrants?	New party? [0=no, 1=yes]	Derex year	Anti-establishment Attitudes [DEREX]	Party legitimacy	Institutional legitimacy - parliaments	Institutional legitimacy - governments	Trust in democracy				Hallin-Mancini & Castro Herrero et al. class	Emanuele & Chiaramonte 2016
		Currently existing? [0=no, 1=yes]	Continued presence?	Best result? [votes]	Best rank?					How many years?	Still in office? [0=no, 1=yes]	Internal to political system?	Outside social capital	ParlGov L-R	Manifesto Project year	Manifesto Project RiLe	Manifesto Project EU: negative [per 110]	Manifesto Project Political corruption [per 304]	Manifesto Project Foreign financial inflluence [per 103.2]	Manifesto Project Immigration: negative [per 601.2]				Eurobarometer - parties (tend to trust)	Eurobarometer - national parliament (tend to trust)	Eurobarometer - national government (tend to trust)	Eurobarometer 1973 - satisfaction with democracy, net value ((VS+FS)-(NV+NaA))	Eurobarometer 1999 - satisfaction with democracy ((VS+FS)-(NV+NAA))	Eurobarometer 2004 - satisfaction with democracy ((VS+FS)-(NV+NAA))	Eurobarometer 2010 - satisfaction with democracy ((VS+FS)-(NV+NAA))	a=mediterranean; b=anglo-saxon; c= central-north Europe; d=eastern northern cluster; e= eastern central cluster; f= eastern eastern cluster	Cumulative party system innovation in the last election held in each country.	Variation in the cumulative party system innovation since 2010.
Austria	Team Stronach	0	2013-2017	0.057	5	0	Frank Stronach	1	2012-2015	4	0	Outsider	Business	6	2013	0.971	3.803	8.414	0.566	0.243	1	2011	14	0.2997	0.64181	0.62377		0.362854	0.321291	0.573	C	22.6	-1.7
Belgium	List Dedecker (LDD)	1	2007-2014	0.04	7	0	Jean-Marie Dedecker	1	2007-2018	12	1	Outsider	Sports	6	2010	41.463	0	2.439			1	2009	11	0.28484	0.41099	0.35605	0.3	0.029139	0.265438	0.122409	C	43.5	13.6
	Parti Populaire (PP)	1	2010-2018	0.015	13	0	Mischaël Modrikamen	1	2009-2018	10	1	Outsider	Law	7.4							1	2009	11	0.28484	0.41099	0.35605	0.3	0.029139	0.265438	0.122409	C	43.5	13.6
Bulgaria	National Movement Simeon II (Natsionalno Dvizhenie Simeon Vtori, NDSV)	1	2001-2013	0.427	1	3	Simeon Saxe-Coburg-Gotha	1	2001-2009	8	0	Outsider	Royal family	5.8	2005	-8.56	0	1.167			1	2007	54	0.06755	0.13859	0.21827			-0.52291	-0.484	F
	National Union Attack (Natsionalen Sayuz Ataka, ATAKA)	1	2005-2017	0.094	4	0	Volen Siderov	1	2005-2018	14	1	Outsider	Media	5.5	2014	-11.628	11.628	0	1.163	0	1	2007	54	0.06755	0.13859	0.21827			-0.52291	-0.484	F
Croatia	Croatian Party of Rights dr. Ante Starčević (HSP-AS)	1	2011-2016	0.006	9	0	Ruža Tomašić	1	2009-2014	6	0	Outsider	Law enforcement	8.7							1	2009	33	0.07	0.156	0.135			-0.47	-0.51648	E
Czech Republic	ANO	1	2013-2018	0.296	1	3	Andrej Babiš	1	2012-2018	7	1	Outsider	Business	6	2013	-9.945	0	1.657			1	2011	28	0.09381	0.12035	0.14188			-0.07256	-0.08521	E
	Dawn of Direct Democracy (Úsvit přímé demokracie, ÚSVIT)	1	2013-2017	0.069	6	0	Tomio Okamura	1	2013-2015	3	0	Outsider	Entertainment	7.4	2013	5.498	1.718	1.375			1	2013	31	0.0998	0.11078	0.12887			-0.07256	-0.08521	E
	Public Affairs (Věci veřejné, VV)	0	2010-2013	0.109	5	2	Vít Bárta	0	2013	1	0	Outsider	Business	6	2010	0.83	0.237	6.287			1	2013	31	0.0998	0.11078	0.12887			-0.07256	-0.08521	E
Greece	LAOS	1	2007-2012	0.056	4	2	Georgios Karatzaferis	1	2000-2018	19	1	Outsider	Media	9.1	2007	-1.571	0.823	4.637			1	2005	16	0.226	0.47	0.399		0.248365	0.290047	-0.374	A	22.2	11.7
Hungary	Politics Can Be Different (Lehet Más a Politika, LMP)	1	2010-2018	0.075	4	0	Bernadett Szél	0	2010-2018	9	1	Outsider	Academia	2.5	2014	-10.706	0	5.398	0	0	1	2009	46	0.10369	0.14542	0.13831			-0.23373	-0.28208	F
Italy	Forza Italia	1	1999-2018	0.382	1	3	Silvio Berlusconi	1	1994-2018	25	1	Outsider	Business	7.1	2013	3.81	0	2.381			1	2003	11	0.14762	0.40481	0.34262	-0.45	-0.29776	-0.26606	-0.04572	A	72.8	14.5
	Movimento 5 Stelle	1	2013-2018	0.325	1	0	Beppe Grillo	1	2009-2017	9	0	Outsider	Entertainment	2.5	2013	-49.032	0	5.161			1	2013	33	0.07221	0.12154	0.11177	-0.45	-0.29776	-0.26606	-0.04572	A	72.8	14.5
Latvia	New Era Party (Jaunais laiks, JL)	0	2002-2010	0.239	1	3	Einars Repše	1	2001-2007	7	0	Outsider	Central bank	7.3	2002	-8.955	0	7.463			1	2007	35	0.06866	0.18559	0.19763			-0.05274	-0.34032	D
Lithuania	The Labour Party (Darbo Partija, DP)	1	2004-2018	0.284	1	2	Viktor Uspaskich	1	2003-2018	16	1	Outsider	Business	3.9	2012	-24.02	0	0.858			1	2009	45	0.08456	0.10039	0.18996			-0.28144	-0.62414	D
	Order and Justice Party (TT)	1	2004-2018	0.127	3	2	Rolandas Paksas	1	2002-2004	3	0	Outsider	Sports	5.3	2012	2.597	0	7.143			1	2009	45	0.08456	0.10039	0.18996			-0.28144	-0.62414	D
Netherlands	List Pim Fortuyn (LPF)	0	2002-2006	0.17	2	2	Pim Fortuyn	1	2002	1	0	Outsider	Academia	8.6	2002	14.961	0	0			1	2003	7	0.32464	0.51363	0.4348	0.14	0.582734	0.297421	0.516288	C	32.4	5.1
Poland	Kukiz Movement (Kukiz’15)	1	2015-2018	0.088	3	0	Paweł Kukiz	1	2015-2018	4	1	Outsider	Entertainment	8.7							1	2015	36	0.12725	0.16533	0.20441			-0.35	0.154	E
Romania	Greater Romania Party (Partidul România Mare, PRM)	1	1999-2008	0.195	2	0	Corneliu Vadim Tudor	1	1991-2015	25	0	Outsider	Media	6.7	2004	5.56	0	0			1	2007	32	0.108	0.19431	0.19529			-0.37648	-0.58235	F
	People’s Party—Dan Diaconescu (Partidul Poporului—Dan Diaconescu, PP-DD)	0	2012-2016	0.14	3	0	Dan Diaconescu	1	2011-2012	2	0	Outsider	Media	1.2	2012	-20.741	0	0			1	2009	31	0.11957	0.15514	0.21464			-0.37648	-0.58235	F
Slovakia	Alliance of the New Citizen (Aliancia Nového Občana, ANO)	1	2002-2006	0.08	6	2	Pavol Rusko	1	2001-2007	7	0	Outsider	Business	7.2	2002	18.486	0	3.118			1	2005	30	0.11271	0.23014	0.22182			-0.48843	-0.27653	D
Switzerland	SVP	1	1999-2018	0.294	1	3	Christoph Blocher	0	1991-2018	28	0	Outsider	Business	7.4	2011	0.833	35	0			0	2003	4	--	--	--	--	--	--	--	C	18	-1.7
	League of Ticinesians (LdTi)	1	1999-2018	0.009	9	0	Giuliano Bignasca	1	1991-2013	23	0	Outsider	Business	8.7	2007	13.303	2.752	0			0	2003	4	--	--	--	--	--	--	--	C	18	-1.7
Mean		0.782609		0.155522	4	0.478261		0.869565		10.5652	0.391304			6.30435		-1.8423	2.79805	2.8749			0.913043		27.913	0.14035	0.239313	0.245107						38.4222	7.54444
SD				0.125342	3.1909					8.30567				2.1272		18.3454	8.04379	2.87539					15.4682	0.0863908	0.162799	0.128753
